# Supplementary material
Source: publisher figshare collection journal article supplement (https://gsapubs.figshare.com/ndownloader/files/23313554)
Supplement: Supplementary file 1 [file 23313554]

## Sheet: Sand petrography DSDP Leg 1, 10
Sample1	Depth (mbsf)	Quartzm	Quartzp	Feldsparplg	Feldsparksp	Lithicvolc	Lithicplut	Lithicmeta	Lithicsed-Clastic	Lithicsed-Carb	Mica	Heavy min	Hornblende	Pyroxene
3-2-2sz	37.49	180	12	33	39	15	0	0	0	35	1	2	2	1
87-1-2sz	650.76	72	7	66	13	26	3	3	3	12	4	5	8	1
90-13-3s2	766.88	71	18	75	25	57	27	0	1	14	5	1	8	0
90-13-4sz	768.42	71	15	63	15	51	3	4	7	11	4	0	8	2
91-1-3sz	63.4	117	2	48	26	18	0	0	0	72	5	3	4	0
91-4-3sz	180.97	134	3	50	31	23	0	0	1	43	10	3	4	1
91-7-3s	410.43	124	2	62	16	17	0	0	0	48	6	9	6	0
91-9-2s	531.75	84	4	28	6	31	0	0	6	73	7	1	0	0
91-9-5sz	536.77	109	3	31	0	15	0	0	11	39	1	9	3	0
3-11-1sz	621.3	79	10	80	19	15	5	2	4	11	12	2	15	0
91-11-2sz	771.79	94	4	73	34	46	9	3	2	25	8	2	6	0
91-18-6sz	843.57	66	7	100	15	53	4	0	2	11	6	0	11	3
91-20-4s	859.7	52	6	82	24	88	12	2	10	14	7	1	4	3
91-22-1sz	866.88	49	16	76	20	96	14	5	5	19	4	2	5	0
91-25-2sz	892.78	30	10	81	12	113	13	21	4	6	3	0	3	13
1samples are were collected from the IODP Gulf Coast Repository in College Station, TX USA. Names defined by Site#-Core#-Sec#; s/sz = sand

## Sheet: DZ U-Pb DSDP Leg 1 Stockli Lab
Sample Name:								207/235		206/238		207/206		Best age
Grain #	[U] ppm	U/Th	207/235	2σ error	206/238	2σ error	RHO	Age Ma	2σ error	Age (Ma)	2σ error	Age (Ma)	2σ error	(Ma)	2σ error	% Discordance*	Rim/Core
Site 3 Core 2 Section 2; 37.5 mbsf:
2R01W_1.FIN2	74.29	2.138	3.406	0.089	0.2624	0.0027	0.080655	1506	21	1503	14	1483	25	1483	25	1.34862
2R01W_2.FIN2	193.2	1.014	1.761	0.059	0.1724	0.0034	0.17787	1029	21	1025	19	1066	37	1066	37	3.84615
2R01W_3.FIN2	38.9	0.79	2.3	0.11	0.2101	0.0027	0.10065	1202	32	1229	14	1128	43	1128	43	8.9539
2R01W_4.FIN2	90.8	1.254	5.48	0.12	0.3453	0.0043	0.010856	1895	18	1911	20	1868	20	1868	20	2.30193
2R01W_5.FIN2	43.8	1.541	1.884	0.083	0.1791	0.0033	0.056205	1074	29	1064	18	1107	55	1107	55	3.88437
2R01W_6.FIN2	57.7	0.503	3.54	0.15	0.2584	0.0048	0.43221	1532	33	1485	23	1627	35	1627	35	8.72772
2R01W_7.FIN2	63	1.076	3.265	0.079	0.2659	0.0026	0.14924	1472	19	1519	13	1408	25	1408	25	7.88352
2R01W_8.FIN2	108.4	1.484	9.21	0.22	0.4078	0.0056	0.0026494	2355	22	2204	26	2514	22	2514	22	12.3309
2R01W_9.FIN2	89	2.315	2.595	0.059	0.2273	0.0032	0.073359	1295	17	1323	17	1254	34	1254	34	5.50239
2R01W_10.FIN2	99.7	1.38	3.3	0.076	0.2624	0.0033	0.033373	1481	17	1502	17	1465	25	1465	25	2.5256
2R01W_11.FIN2	55.3	0.8346	12.99	0.31	0.5152	0.0048	0.013629	2673	23	2680	21	2660	15	2660	15	0.75188
2R01W_12.FIN2	40.9	0.4301	1.89	0.062	0.1812	0.0023	0.11042	1072	22	1073	13	1026	44	1026	44	4.5809
2R01W_13.FIN2	94.1	1.897	16.52	0.6	0.64	0.012	0.19499	2906	35	3187	46	2734	18	2734	18	16.5691
2R01W_14.FIN2	75.1	1.032	13.81	0.39	0.5395	0.0049	0.22449	2735	27	2781	21	2706	20	2706	20	2.77162
2R01W_15.FIN2	80.9	1.477	3.446	0.095	0.2744	0.0025	0.022202	1511	22	1564	13	1405	22	1405	22	11.3167
2R01W_16.FIN2	121.2	0.8324	5.298	0.095	0.3398	0.0037	0.14414	1876	15	1885	18	1840	18	1840	18	2.44565
2R01W_17.FIN2	288	2.5	0.3343	0.0083	0.04577	0.00059	0.11425	293.6	6.2	288.5	3.6	316	47	288.5	3.6	1.73706
2R01W_18.FIN2	177.1	1.388	4.042	0.083	0.2882	0.0029	0.2389	1643	16	1632	15	1663	24	1663	24	1.8641
2R01W_19.FIN2	43.1	1.523	4.16	0.12	0.3009	0.0029	0.038807	1659	24	1695	14	1618	24	1618	24	4.75896
2R01W_20.FIN2	75.6	0.5858	11.99	0.29	0.4718	0.0062	0.0017779	2602	23	2494	28	2618	21	2618	21	4.73644
2R01W_21.FIN2	475	4.273	3.648	0.05	0.2741	0.0028	0.22887	1559	11	1561	14	1549	18	1549	18	0.774693
2R01W_22.FIN2	73.1	1.004	12.96	0.27	0.493	0.0047	0.077979	2675	20	2583	20	2718	14	2718	14	4.96689
2R01W_23.FIN2	142.7	1.376	11.29	0.21	0.4816	0.004	0.22542	2545	17	2533	17	2564	11	2564	11	1.20905
2R01W_24.FIN2	173	0.863	4.531	0.098	0.3123	0.0026	0.072284	1734	18	1752	13	1714	19	1714	19	2.21704
2R01W_25.FIN2	351	1.601	1.866	0.037	0.1808	0.0015	0.27634	1067	13	1071.2	8.1	1059	19	1059	19	1.15203
2R01W_26.FIN2	50.2	1.258	2.857	0.081	0.2395	0.0023	0.038266	1370	22	1384	12	1290	29	1290	29	7.28682
2R01W_27.FIN2	131.8	1.44	3.908	0.083	0.2969	0.0034	0.11892	1618	18	1676	17	1586	22	1586	22	5.67465
2R01W_28.FIN2	68.8	1.012	4.48	0.11	0.3145	0.0037	0.013395	1726	20	1762	18	1649	21	1649	21	6.85264
2R01W_29.FIN2	34.9	1.592	3	0.12	0.2543	0.004	0.02435	1398	30	1460	21	1369	49	1369	49	6.64719
2R01W_30.FIN2	89.4	1.037	3.593	0.083	0.2804	0.0025	0.036508	1550	18	1593	12	1480	22	1480	22	7.63514
2R01W_31.FIN2	136.2	1.638	4.415	0.075	0.2942	0.003	0.15505	1714	14	1662	15	1763	18	1763	18	5.72887
2R01W_32.FIN2	200.8	0.747	5.27	0.088	0.3313	0.0024	0.22938	1862	14	1844	11	1865	14	1865	14	1.12601
2R01W_33.FIN2	117.1	1.673	0.721	0.029	0.0829	0.0016	0.42752	549	17	513.5	9.7	736	54	513.5	9.7	6.4663
2R01W_34.FIN2	84.7	0.922	4.205	0.087	0.2989	0.0028	0.12637	1679	17	1685	14	1664	19	1664	19	1.26202
2R01W_35.FIN2	43.8	2.04	15.11	0.83	0.529	0.028	0.22862	2818	50	2730	120	2819	57	2819	57	3.15715
2R01W_36.FIN2	114.4	0.854	12.18	0.29	0.4895	0.0052	0.023663	2624	22	2568	22	2692	15	2692	15	4.60624
2R01W_37.FIN2	157.3	1.363	0.184	0.013	0.02613	0.00044	0.054257	171	11	166.3	2.8	170	120	166.3	2.8	2.74854
2R01W_38.FIN2	131.3	0.764	5.74	0.13	0.3497	0.0046	0.13298	1938	19	1935	22	1909	20	1909	20	1.36197
2R01W_39.FIN2	164.3	1.375	1.713	0.036	0.1697	0.0014	0.16657	1013	13	1010.6	7.7	1035	27	1035	27	2.35749
2R01W_40.FIN2	128.6	1.286	3.25	0.064	0.2594	0.0023	0.14288	1468	15	1487	12	1462	20	1462	20	1.70999
2R01W_41.FIN2	102.2	2.82	0.0286	0.0028	0.00459	0.00012	0.0040381	28.5	2.7	29.52	0.76	-50	160	29.52	0.76	3.57895
2R01W_42.FIN2	133.3	0.915	0.1892	0.0072	0.02671	0.00034	0.25111	175.4	6.2	169.9	2.2	212	71	169.9	2.2	3.13569
2R01W_43.FIN2	122.7	1.45	3.388	0.061	0.2625	0.0022	0.029506	1498	14	1502	11	1495	19	1495	19	0.468227
2R01W_44.FIN2	236	2.338	1.782	0.027	0.1758	0.0014	0.17013	1038.3	9.5	1044	7.9	1037	18	1037	18	0.675024
2R01W_45.FIN2	179.8	1.411	4.591	0.084	0.3208	0.0037	0.02751	1746	15	1793	18	1703	21	1703	21	5.28479
2R01W_46.FIN2	102.1	1.39	2.234	0.043	0.204	0.0017	0.12357	1189	13	1196.6	9	1188	23	1188	23	0.723906
2R01W_48.FIN2	190	1.961	0.0939	0.0049	0.01393	0.00038	0.037432	90.9	4.5	89.1	2.4	180	100	89.1	2.4	1.9802
2R01W_49.FIN2	51.92	1.245	11.02	0.28	0.4595	0.0057	0.22147	2530	24	2438	26	2654	15	2654	15	8.13866
2R01W_50.FIN2	228.4	1.105	17.76	0.26	0.6066	0.0064	0.28195	2977	14	3055	26	2929	13	2929	13	4.30181
2R01W_51.FIN2	58	0.74	4.5	0.12	0.3194	0.0038	0.024375	1727	22	1786	18	1616	27	1616	27	10.5198
2R01W_52.FIN2	244.6	1.768	0.0515	0.0023	0.0081	0.00015	0.11038	50.9	2.3	52	0.98	39	82	52	0.98	2.1611
2R01W_53.FIN2	102.9	1.032	0.595	0.016	0.0784	0.0014	0.16583	476	10	486.5	8.2	451	52	486.5	8.2	2.20588
2R01W_54.FIN2	105.4	1.442	10.04	0.32	0.438	0.011	0.1451	2442	29	2339	51	2533	29	2533	29	7.6589
2R01W_55.FIN2	11.37	2.29	2.55	0.16	0.1998	0.004	0.080655	1261	47	1175	21	1244	66	1244	66	5.54662
2R01W_56.FIN2	88.5	1.34	3.528	0.074	0.2742	0.0029	0.099655	1538	16	1561	15	1524	22	1524	22	2.42782
2R01W_57.FIN2	252	2.79	6.43	0.19	0.426	0.012	0.81617	2030	25	2284	55	1870	27	1870	27	22.139
2R01W_58.FIN2	56	1.979	2.313	0.089	0.204	0.0034	0.2545	1204	27	1196	18	1264	48	1264	48	5.37975
2R01W_59.FIN2	25.59	1.275	1.897	0.083	0.1949	0.0028	0.15489	1075	29	1147	15	974	52	974	52	17.7618
2R01W_60.FIN2	74.4	1.826	1.954	0.047	0.2063	0.0033	0.02408	1097	16	1208	18	1009	37	1009	37	19.7225
2R01W_61.FIN2	12.38	1.486	15.62	0.8	0.627	0.017	0.11783	2839	46	3147	67	2671	33	2671	33	17.821
2R01W_62.FIN2	108.9	1.046	0.1064	0.0071	0.01562	0.00033	0.12501	102.2	6.5	99.9	2.1	130	120	99.9	2.1	2.25049
2R01W_63.FIN2	15.62	0.3666	2.13	0.1	0.2036	0.0035	0.030476	1153	31	1194	19	1048	55	1048	55	13.9313
2R01W_64.FIN2	119	1.398	3.259	0.073	0.2658	0.0057	0.36629	1468	17	1518	29	1501	30	1501	30	1.13258
2R01W_65.FIN2	85.6	0.97	4.3	0.1	0.3213	0.0056	0.16575	1689	19	1795	28	1648	26	1648	26	8.9199
2R01W_66.FIN2	48.1	1.157	2.5	0.085	0.2276	0.0041	0.062742	1270	24	1321	22	1268	44	1268	44	4.17981
2R01W_67.FIN2	69.1	2	3.19	0.11	0.2683	0.0048	0.061775	1453	25	1531	24	1347	43	1347	43	13.66
2R01W_68.FIN2	42.2	0.963	2.069	0.076	0.2021	0.0023	0.10644	1136	25	1186	12	1040	42	1040	42	14.0385
2R01W_69.FIN2	62.8	4.22	5.17	0.17	0.3454	0.0057	0.061361	1846	28	1912	27	1776	28	1776	28	7.65766
2R01W_70.FIN2	18.88	1.793	3.17	0.13	0.2715	0.0035	0.022385	1444	30	1548	18	1427	44	1427	44	8.47933
2R01W_71.FIN2	162.7	0.506	3.033	0.061	0.245	0.0044	0.35938	1413	15	1414	23	1504	22	1504	22	5.98404
2R01W_72.FIN2	79	1.485	2.271	0.059	0.1776	0.0022	0.05847	1200	18	1053	12	1531	29	DISC	DISC	31.2214
2R01W_73.FIN2	33.9	1.641	0.132	0.012	0.02034	0.00054	0.022248	124	10	129.8	3.4	20	140	129.8	3.4	4.67742
2R01W_74.FIN2	75.5	1.63	6.35	0.15	0.3928	0.0053	0.21646	2022	21	2134	25	1972	22	1972	22	8.21501
2R01W_75.FIN2	71.7	1.172	3.334	0.08	0.2802	0.0033	0.12633	1493	18	1592	17	1434	27	1434	27	11.0181
2R01W_76.FIN2	75.6	1.601	3.161	0.079	0.2675	0.002	0.071369	1453	18	1528	10	1407	22	1407	22	8.59986
2R01W_77.FIN2	215	6.39	0.786	0.024	0.0979	0.0016	0.040561	591	14	601.8	9.6	576	51	601.8	9.6	1.82741
2R01W_78.FIN2	40.2	1.072	4.4	0.2	0.321	0.013	0.24461	1710	37	1795	62	1627	67	1627	67	10.3258
2R01W_79.FIN2	68	1.241	2.515	0.063	0.2355	0.0032	0.14713	1275	18	1363	17	1220	30	1220	30	11.7213
2R01W_80.FIN2	147	1.86	6.02	0.13	0.3875	0.0053	0.37144	1981	20	2110	25	1923	15	1923	15	9.72439
2R01W_81.FIN2	25.4	1.288	2.49	0.12	0.2336	0.0056	0.0079014	1261	33	1351	29	1089	59	1089	59	24.0588
2R01W_82.FIN2	110.4	1.275	4.776	0.087	0.3333	0.0045	0.15653	1777	15	1853	22	1710	23	1710	23	8.36257
2R01W_83.FIN2	23.9	0.64	14.91	0.56	0.581	0.01	0.11618	2802	35	2954	41	2710	24	2710	24	9.00369
2R01W_84.FIN2	77.2	1.838	3.095	0.074	0.2529	0.0045	0.049471	1430	19	1452	23	1461	30	1461	30	0.616016
2R01W_85.FIN2	26.5	3.58	3.47	0.17	0.2674	0.0047	0.059271	1511	39	1527	24	1474	46	1474	46	3.59566
2R01W_86.FIN2	33.56	0.61	12.59	0.45	0.5125	0.0088	0.20596	2643	35	2669	37	2680	19	2680	19	0.410448
2R01W_87.FIN2	28.7	1.69	2.87	0.12	0.2542	0.005	0.21092	1361	29	1463	26	1273	45	1273	45	14.9254
2R01W_88.FIN2	44.3	0.968	13.89	0.44	0.5362	0.008	0.090596	2735	30	2765	34	2774	20	2774	20	0.324441
2R01W_89.FIN2	72.2	1.575	3.47	0.22	0.272	0.012	0.33498	1511	49	1548	58	1578	98	1578	98	1.90114
2R01W_90.FIN2	197	1.114	0.1082	0.0041	0.01674	0.00032	0.074896	104.1	3.8	107	2	59	66	107	2	2.78578
2R01W_91.FIN2	70.6	1.299	15.3	0.33	0.5976	0.0047	0.17182	2831	21	3019	19	2747	13	2747	13	9.90171
2R01W_92.FIN2	49.3	0.696	4.56	0.13	0.3266	0.0049	0.18957	1739	23	1826	25	1646	30	1646	30	10.9356
2R01W_93.FIN2	44.5	0.528	1.905	0.053	0.1934	0.002	0.12921	1079	19	1140	11	1039	40	1039	40	9.72089
2R01W_94.FIN2	140	0.534	3.87	0.082	0.3035	0.0046	0.13491	1607	17	1707	23	1529	23	1529	23	11.6416
2R01W_95.FIN2	45.76	1.277	3.34	0.13	0.2722	0.0042	0.018178	1488	29	1551	21	1461	42	1461	42	6.16016
2R01W_96.FIN2	100.8	1.695	4.06	0.13	0.2903	0.0052	0.27606	1642	26	1649	27	1639	28	1639	28	0.610128
2R01W_97.FIN2	81.6	0.723	5.15	0.19	0.3354	0.0053	0.1631	1842	30	1864	26	1870	36	1870	36	0.320856
2R01W_98.FIN2	81.1	1.128	2.127	0.054	0.2049	0.003	0.066108	1157	17	1203	16	1101	31	1101	31	9.26431
2R01W_99.FIN2	48.5	1.218	3.074	0.088	0.26	0.0034	0.037517	1424	22	1489	17	1450	32	1450	32	2.68966
2R01W_101.FIN2	55.8	1.159	2.918	0.098	0.2453	0.005	0.0039864	1376	25	1415	26	1406	42	1406	42	0.640114
2R01W_102.FIN2	41.7	1.313	2.68	0.1	0.2501	0.0034	0.10917	1320	29	1438	18	1269	33	1269	33	13.3176
2R01W_103.FIN2	70.2	1.2	2.094	0.055	0.2066	0.0027	0.053022	1144	18	1213	15	1100	30	1100	30	10.2727
2R01W_104.FIN2	32.46	0.43	15.18	0.45	0.6145	0.0069	0.079923	2826	27	3086	28	2720	15	2720	15	13.4559
2R01W_105.FIN2	38.5	0.542	15.61	0.46	0.598	0.0062	0.03905	2843	28	3020	25	2735	17	2735	17	10.4205
2R01W_106.FIN2	114.7	0.766	1.919	0.038	0.1932	0.0021	0.26204	1085	13	1140	11	1043	29	1043	29	9.3001
2R01W_107.FIN2	78.5	2.166	3.469	0.074	0.2892	0.0043	0.056775	1516	17	1639	21	1485	24	1485	24	10.3704
2R01W_108.FIN2	57.2	2.026	3.32	0.12	0.2679	0.0059	0.14987	1484	28	1533	31	1494	40	1494	40	2.61044
2R01W_109.FIN2	12.06	0.66	5	0.28	0.34	0.0071	0.061828	1797	47	1884	34	1642	42	1642	42	14.7381
2R01W_110.FIN2	26.6	0.414	3.64	0.13	0.2874	0.0042	0.14927	1554	30	1627	21	1496	36	1496	36	8.75668
2R01W_111.FIN2	129.2	14.69	0.619	0.026	0.0828	0.002	0.12821	488	16	513	12	404	72	513	12	5.12295	Rim
2R01W_111.FIN2	10.44	0.422	1.77	0.14	0.1886	0.006	0.25411	1014	53	1117	34	949	87	949	87	17.7028	Core
2R01W_112.FIN2	46.29	0.8104	14.93	0.34	0.5892	0.0055	0.15128	2808	22	2985	22	2714	14	2714	14	9.98526
2R01W_113.FIN2	60.5	0.774	14.77	0.47	0.5794	0.0075	0.26881	2803	30	2947	30	2706	15	2706	15	8.90613
2R01W_114.FIN2	87.7	1.101	0.653	0.018	0.0844	0.0014	0.012907	508	11	522.2	8.1	529	54	522.2	8.1	2.79528
2R01W_115.FIN2	106.1	2.762	3.631	0.081	0.295	0.0037	0.12901	1555	18	1666	18	1504	20	1504	20	10.7713
2R01W_116.FIN2	233.1	1.754	2.246	0.041	0.2108	0.0031	0.021815	1193	13	1232	16	1207	24	1207	24	2.07125
2R01W_117.FIN2	117.4	1.251	3.494	0.092	0.2821	0.0049	0.34426	1523	20	1601	25	1442	27	1442	27	11.0264
2R01W_118.FIN2	33.53	1.744	3.57	0.13	0.302	0.0061	0.12993	1532	29	1700	30	1410	41	1410	41	20.5674
2R01W_119.FIN2	18.02	0.724	2.01	0.1	0.2004	0.0035	0.005723	1105	34	1176	19	1016	64	1016	64	15.748
2R01W_120.FIN2	37.79	0.542	3.58	0.11	0.2883	0.0036	0.017766	1541	24	1632	18	1450	34	1450	34	12.5517
2R01W_121.FIN2	96.3	1.02	3.259	0.066	0.262	0.0024	0.1103	1472	16	1499	12	1455	23	1455	23	3.02405
2R01W_122.FIN2	45.6	0.89	13.88	0.36	0.5644	0.0074	0.036857	2741	25	2883	30	2734	19	2734	19	5.44989
Site 3 Core 11 Section 1; 621.3 mbsf:
11R01W_1.FIN2	135.3	0.797	0.314	0.011	0.04404	0.00057	0.078375	276.3	8	278.2	3.6	234	62	278.2	3.6	0.687658
11R01W_2.FIN2	182	1.37	0.317	0.0077	0.04446	0.00058	0.17026	279	5.9	280.4	3.6	249	56	280.4	3.6	0.501792
11R01W_3.FIN2	314	0.986	0.02	0.0017	0.002852	8.3e-05	0.1375	20.1	1.7	18.36	0.53	180	160	18.36	0.53	8.65672
11R01W_4.FIN2	134	1.046	0.0206	0.0026	0.00299	0.00011	0.054747	20.6	2.6	19.24	0.73	130	220	19.24	0.73	6.60194
11R01W_5.FIN2	23.18	0.718	0.0272	0.0096	0.00164	0.00023	0.01001	26.5	9.2	10.6	1.5	660	780	DISC	DISC	60
11R01W_6.FIN2	46	2.347	0.0251	0.0049	0.0027	0.00015	0.12336	24.8	4.8	17.36	0.97	250	330	17.36	0.97	30
11R01W_7.FIN2	59.1	1.622	0.223	0.012	0.03115	0.00056	0.10412	203.1	9.8	197.7	3.5	190	100	197.7	3.5	2.65879
11R01W_8.FIN2	225	1.308	0.0314	0.0034	0.00469	0.00014	0.070613	31.2	3.3	30.15	0.87	70	180	30.15	0.87	3.36538
11R01W_9.FIN2	134.3	1.204	0.3171	0.0092	0.04325	0.00056	0.11505	278.8	7	272.9	3.4	299	65	272.9	3.4	2.11621
11R01W_10.FIN2	117.8	1.007	0.3005	0.0083	0.0417	0.00055	0.11134	266.8	6.4	263.3	3.4	276	62	263.3	3.4	1.31184
11R01W_11.FIN2	87.5	0.7787	0.3081	0.0091	0.04446	0.0005	0.040521	271.9	7.1	280.4	3.1	222	67	280.4	3.1	3.12615
11R01W_12.FIN2	91.9	0.971	0.0177	0.0028	0.00287	0.00012	0.19563	17.7	2.8	18.48	0.78	-110	230	18.48	0.78	4.40678
11R01W_13.FIN2	161.3	0.806	0.0184	0.0024	0.002414	9.1e-05	0.25278	18.4	2.4	15.54	0.58	270	230	15.54	0.58	15.5435
11R01W_14.FIN2	229.5	2.59	5.914	0.067	0.3513	0.0038	0.59578	1962.5	9.9	1940	18	1984	18	1984	18	2.21774
11R01W_15.FIN2	628	1.594	0.0264	0.0015	0.0036	0.00015	0.28186	26.4	1.5	23.17	0.98	340	110	23.17	0.98	12.2348
11R01W_16.FIN2	475	1.722	0.01965	0.00094	0.002723	7.1e-05	0.089234	19.75	0.93	17.53	0.46	310	100	17.53	0.46	11.2405
11R01W_17.FIN2	152	1.02	0.32	0.01	0.04405	0.00065	0.20315	280.8	7.9	277.9	4	283	65	277.9	4	1.03276
11R01W_18.FIN2	229	1.271	0.2851	0.0068	0.04023	0.00034	0.27149	254.8	5.5	254.2	2.1	258	49	254.2	2.1	0.235479
11R01W_19.FIN2	259	1.092	0.85	0.012	0.1002	0.0012	0.56104	624.7	6.7	615.5	7.2	677	30	615.5	7.2	1.47271
11R01W_20.FIN2	73.5	0.535	0.236	0.014	0.03265	0.00075	0.061381	214	11	207.1	4.7	250	120	207.1	4.7	3.2243
11R01W_21.FIN2	1052.5	2.858	1.366	0.01	0.14274	0.0009	0.6161	874.3	4.3	860.1	5.1	907	12	907	12	5.17089
11R01W_22.FIN2	92	1.532	6.88	0.086	0.3866	0.0038	0.63115	2095	11	2106	18	2082	16	2082	16	1.15274
11R01W_23.FIN2	257	0.878	0.0257	0.0035	0.00291	0.00011	0.034525	25.7	3.5	18.76	0.73	520	270	18.76	0.73	27.0039
11R01W_24.FIN2	235.7	1.096	0.0127	0.0024	0.001858	9.1e-05	0.0045325	12.8	2.4	11.96	0.59	70	330	11.96	0.59	6.5625
11R01W_25.FIN2	116.4	1.045	0.0227	0.0028	0.00382	0.00015	0.056963	22.6	2.8	24.59	0.95	-140	190	24.59	0.95	8.80531
11R01W_26.FIN2	280	1.173	3.911	0.048	0.2898	0.003	0.63411	1616.7	9.6	1640	15	1586	19	1586	19	3.40479
11R01W_27.FIN2	266	1.52	0.616	0.021	0.0791	0.0024	0.26535	487	13	491	14	461	61	491	14	0.821355	Rim
11R01W_27.FIN2	196.6	3.72	1.537	0.05	0.1558	0.0034	0.74573	947	21	933	19	956	39	956	39	2.40586	Core
11R01W_28.FIN2	70.2	1.484	1.767	0.037	0.1778	0.0015	0.094155	1031	13	1054.9	8	975	41	975	41	8.19487
11R01W_29.FIN2	44.2	1.618	3.602	0.059	0.2771	0.0037	0.34754	1549	13	1578	18	1510	31	1510	31	4.50331
11R01W_30.FIN2	874	1.746	0.0194	0.001	0.002878	4.1e-05	0.11129	19.5	1	18.52	0.26	149	99	18.52	0.26	5.02564
11R01W_31.FIN2	100.7	1.333	0.0228	0.0032	0.00286	0.00012	0.069691	22.7	3.1	18.39	0.75	330	250	18.39	0.75	18.9868
11R01W_32.FIN2	199	1.04	0.3217	0.0085	0.04556	0.00049	0.11609	283.3	6.5	287.2	3	256	60	287.2	3	1.37663
11R01W_33.FIN2	189.7	0.803	0.0115	0.0033	0.00179	0.00016	0.10042	11.6	3.3	11.5	1	10	450	11.5	1	0.862069
11R01W_34.FIN2	42.6	0.488	0.0183	0.0065	0.0019	0.00021	0.1131	18.2	6.5	12.2	1.3	580	620	12.2	1.3	32.967
11R01W_35.FIN2	262	1.971	1.701	0.017	0.1696	0.0014	0.51626	1009.6	6.6	1009.9	7.8	1007	20	1007	20	0.287984
11R01W_36.FIN2	95	1.71	0.328	0.012	0.04571	0.00082	0.078054	287.9	8.9	288.1	5.1	252	82	288.1	5.1	0.0694686
11R01W_37.FIN2	132	2.25	1.781	0.063	0.1684	0.0035	0.28635	1034	23	1003	19	1100	52	1100	52	8.81818
11R01W_38.FIN2	383	0.947	0.0134	0.0017	0.001785	7.2e-05	0.041555	13.4	1.7	11.5	0.46	230	210	11.5	0.46	14.1791
11R01W_39.FIN2	201.1	1.182	8.14	0.15	0.3931	0.0069	0.71444	2243	17	2136	32	2348	19	2348	19	9.02896
11R01W_40.FIN2	27.64	0.571	0.0272	0.009	0.00192	0.00019	0.11082	26.4	8.6	12.4	1.2	460	700	DISC	DISC	53.0303
11R01W_41.FIN2	367	2.581	2.242	0.076	0.2004	0.0067	0.88542	1193	24	1177	36	1298	31	1298	31	9.32203
11R01W_42.FIN2	51.5	1.279	1.772	0.038	0.1775	0.0019	0.022419	1032	14	1053	10	975	41	975	41	8
11R01W_43.FIN2	88.1	0.53	0.29	0.014	0.03959	0.00066	0.02691	257	10	250.3	4.1	266	82	250.3	4.1	2.607
11R01W_44.FIN2	122.1	2.27	1.839	0.044	0.179	0.0025	0.40014	1061	16	1062	14	1042	41	1042	41	1.91939
11R01W_45.FIN2	123.2	1.92	1.86	0.036	0.1806	0.0025	0.41428	1067	12	1070	13	1112	32	1112	32	3.77698
11R01W_46.FIN2	102.9	0.986	0.294	0.012	0.04075	0.00069	0.062162	260.5	9.1	257.5	4.2	271	84	257.5	4.2	1.15163
11R01W_48.FIN2	47.5	1.705	1.793	0.042	0.1806	0.0023	0.037565	1042	15	1071	12	991	49	991	49	8.07265
11R01W_49.FIN2	81.1	1.126	1.565	0.035	0.1583	0.0019	0.25996	954	13	947	11	966	44	966	44	1.96687
11R01W_50.FIN2	217.8	1.424	0.041	0.0027	0.00621	0.00017	0.10247	40.8	2.6	39.9	1.1	140	140	39.9	1.1	2.20588
11R01W_51.FIN2	422	0.834	0.0213	0.0019	0.002691	6.6e-05	0.043471	21.4	1.8	17.32	0.43	300	120	17.32	0.43	19.0654
11R01W_52.FIN2	3750	1.345	0.02216	0.00096	0.0035	0.00011	0.35291	22.24	0.95	22.52	0.7	63	76	22.52	0.7	1.25899
11R01W_53.FIN2	318	1.025	0.0217	0.002	0.002838	9.1e-05	0.17864	21.7	2	18.27	0.58	350	200	18.27	0.58	15.8065
11R01W_54.FIN2	296	1.207	0.0107	0.0011	0.001676	4.9e-05	0.0093062	10.8	1.1	10.79	0.32	-30	170	10.79	0.32	0.0925926
11R01W_55.FIN2	164.5	1.053	0.0268	0.0047	0.002583	8.4e-05	0.1771	26.5	4.4	16.63	0.54	620	220	16.63	0.54	37.2453
11R01W_57.FIN2	199	0.956	0.0197	0.003	0.00249	0.00012	0.14707	19.8	3	16.04	0.78	560	300	16.04	0.78	18.9899
11R01W_58.FIN2	132	0.5191	0.566	0.012	0.07418	0.00071	0.31151	455.3	7.6	461.2	4.2	407	44	461.2	4.2	1.29585
11R01W_59.FIN2	390	0.892	0.6002	0.0099	0.07761	0.0008	0.4566	478.1	6.3	482.3	4.9	475	32	482.3	4.9	0.878477
11R01W_60.FIN2	204.6	2.219	0.0228	0.0026	0.0031	0.00012	0.0034965	22.9	2.6	19.94	0.77	250	220	19.94	0.77	12.9258
11R01W_61.FIN2	142.6	1.228	0.0212	0.0032	0.00295	0.00013	0.17327	20.6	3	18.98	0.86	70	240	18.98	0.86	7.86408
11R01W_62.FIN2	210.9	0.947	0.0118	0.0017	0.001686	8e-05	0.034477	11.9	1.7	10.86	0.51	130	240	10.86	0.51	8.7395
11R01W_63.FIN2	88.3	0.971	0.0233	0.0034	0.001825	9.9e-05	0.077617	23.3	3.4	11.75	0.64	970	320	DISC	DISC	49.5708
11R01W_64.FIN2	83.3	1.205	0.338	0.018	0.04317	0.00091	0.22738	296	13	272.4	5.6	425	98	272.4	5.6	7.97297
11R01W_65.FIN2	115	0.885	0.317	0.017	0.04546	0.00081	0.39381	278	13	286.5	5	220	100	286.5	5	3.05755
11R01W_66.FIN2	220.1	0.765	0.0193	0.0025	0.00177	0.00011	0.11891	19.3	2.5	11.4	0.72	1000	280	DISC	DISC	40.9326
11R01W_67.FIN2	159	0.97	0.2947	0.0075	0.04165	0.0005	0.13775	262.5	6	263.1	3.1	258	60	263.1	3.1	0.228571
11R01W_68.FIN2	237	1.057	0.0111	0.0012	0.001719	6e-05	0.10521	11.2	1.2	11.07	0.39	70	190	11.07	0.39	1.16071
11R01W_69.FIN2	31.13	0.842	0.256	0.019	0.03714	0.00092	0.058356	229	15	235	5.7	170	130	235	5.7	2.62009
11R01W_71.FIN2	41.4	0.69	0.218	0.014	0.03122	0.00075	0.095763	199	12	198.1	4.7	220	130	198.1	4.7	0.452261
11R01W_72.FIN2	113	0.878	0.2022	0.0079	0.0299	0.00048	0.074841	186.3	6.7	189.9	3	118	76	189.9	3	1.93237
11R01W_73.FIN2	474	19.35	0.265	0.005	0.03824	0.00045	0.29554	239	3.9	241.9	2.8	203	40	241.9	2.8	1.21339
11R01W_74.FIN2	207.2	1.276	0.0468	0.0057	0.00206	0.00013	0.2872	46.2	5.5	13.29	0.83	2440	190	DISC	DISC	71.2338
11R01W_75.FIN2	172	1.132	0.0173	0.0018	0.00285	0.00011	0.069246	17.3	1.8	18.32	0.69	-50	180	18.32	0.69	5.89595
11R01W_76.FIN2	612	1.288	0.0219	0.0017	0.003231	7.6e-05	0.14414	22	1.7	20.8	0.49	160	150	20.8	0.49	5.45455
11R01W_77.FIN2	441	1.342	0.0151	0.0011	0.002393	4.5e-05	0.047473	15.1	1.1	15.41	0.29	40	130	15.41	0.29	2.05298
11R01W_78.FIN2	810	1.389	0.0391	0.0027	0.003105	5.6e-05	0.17955	38.8	2.7	19.98	0.36	1390	130	DISC	DISC	48.5052
11R01W_79.FIN2	86.8	0.519	0.293	0.016	0.04191	0.00057	0.041616	259	12	264.6	3.6	154	87	264.6	3.6	2.16216
11R01W_80.FIN2	70.8	1.051	0.345	0.016	0.04444	0.00064	0.12442	297	11	280.2	4	387	93	280.2	4	5.65657
11R01W_81.FIN2	683	3.09	0.614	0.016	0.0773	0.0015	0.58552	486	10	480.1	9.1	536	47	480.1	9.1	1.21399	Rim
11R01W_81.FIN2	152	4.28	1.839	0.046	0.183	0.0034	0.69626	1057	16	1083	19	985	32	985	32	9.94924	Core
11R01W_82.FIN2	147.2	0.74	0.606	0.012	0.07788	0.00094	0.19966	480.7	7.9	483.4	5.6	463	47	483.4	5.6	0.561681
11R01W_83.FIN2	155.1	1.137	0.0122	0.0017	0.001754	7.2e-05	0.0091268	12.3	1.7	11.29	0.46	50	230	11.29	0.46	8.21138
11R01W_84.FIN2	61.8	1.251	1.805	0.039	0.1778	0.0024	0.24724	1047	14	1056	13	1020	47	1020	47	3.52941
11R01W_85.FIN2	72.1	0.478	0.257	0.024	0.03148	0.00059	0.038752	217	12	199.7	3.7	330	110	199.7	3.7	7.97235
11R01W_86.FIN2	272.1	1.89	0.029	0.0019	0.004231	9.7e-05	0.035751	29	1.9	27.22	0.63	180	130	27.22	0.63	6.13793
11R01W_87.FIN2	110.4	0.537	0.2782	0.009	0.04037	0.00051	0.054796	248.6	7.1	255.1	3.1	228	69	255.1	3.1	2.61464
11R01W_88.FIN2	180.8	0.633	0.571	0.01	0.07419	0.00072	0.053502	459.5	6.3	461.3	4.3	446	42	461.3	4.3	0.39173
11R01W_89.FIN2	290.4	1.412	0.0166	0.0016	0.002526	6.3e-05	0.11366	16.7	1.6	16.26	0.4	50	170	16.26	0.4	2.63473
11R01W_90.FIN2	112.1	7.21	0.268	0.013	0.03512	0.00077	0.1104	240	10	222.5	4.8	370	100	222.5	4.8	7.29167
11R01W_91.FIN2	347	1.93	0.0187	0.0015	0.002742	6.6e-05	0.12202	18.7	1.5	17.65	0.42	50	130	17.65	0.42	5.61497
11R01W_92.FIN2	104.9	0.892	0.302	0.01	0.04261	0.00064	0.26981	268.4	7.8	269	4	240	67	269	4	0.223547
11R01W_93.FIN2	437	0.715	0.01138	0.0009	0.001669	4.9e-05	0.008984	11.47	0.9	10.75	0.32	150	150	10.75	0.32	6.27724
11R01W_94.FIN2	122.5	1.02	0.3176	0.0095	0.04229	0.00036	0.055429	280.2	7.1	267	2.2	375	64	267	2.2	4.71092
11R01W_95.FIN2	157	0.7833	0.3093	0.0071	0.04405	0.00037	0.202	273.1	5.5	277.8	2.3	204	50	277.8	2.3	1.72098
11R01W_96.FIN2	109	1.391	0.612	0.021	0.07725	0.00086	0.032087	480	11	479.6	5.1	449	59	479.6	5.1	0.0833333
11R01W_97.FIN2	266	1.037	0.0137	0.0022	0.00179	0.0001	0.0015906	13.8	2.2	11.5	0.65	320	320	11.5	0.65	16.6667
11R01W_98.FIN2	39.1	0.792	0.754	0.038	0.091	0.0016	0.16693	559	16	561.3	9.3	522	83	561.3	9.3	0.411449
11R01W_99.FIN2	177.7	0.904	0.0123	0.0018	0.00181	9.3e-05	0.026888	12.4	1.8	11.66	0.6	20	240	11.66	0.6	5.96774
11R01W_100.FIN2	154	1.29	0.3155	0.0092	0.04467	0.00064	0.16005	279.7	7.1	281.7	3.9	253	57	281.7	3.9	0.715052
11R01W_101.FIN2	106.9	1.096	0.335	0.014	0.04613	0.00057	0.10304	289.8	9.1	290.7	3.5	259	74	290.7	3.5	0.310559
11R01W_102.FIN2	391	0.715	0.0229	0.0016	0.003439	8.2e-05	0.13478	23	1.6	22.13	0.53	100	120	22.13	0.53	3.78261
11R01W_103.FIN2	68	1.069	0.299	0.012	0.04181	0.00062	0.047347	264.6	9.7	264	3.8	250	83	264	3.8	0.226757
11R01W_104.FIN2	311.4	1.488	0.0232	0.002	0.002509	9.2e-05	0.043869	23.3	2	16.15	0.59	700	200	16.15	0.59	30.6867
11R01W_105.FIN2	38	1.687	0.0226	0.0049	0.00237	0.00019	0.10495	22.4	4.7	15.3	1.2	370	370	15.3	1.2	31.6964
11R01W_106.FIN2	38.3	0.833	0.315	0.016	0.04386	0.00092	0.20603	276	12	276.6	5.7	292	98	276.6	5.7	0.217391
11R01W_107.FIN2	321	0.641	0.0154	0.0018	0.00182	6e-05	0.13999	15.5	1.8	11.72	0.38	460	210	11.72	0.38	24.3871
11R01W_108.FIN2	72.7	1.042	0.323	0.012	0.04331	0.00084	0.15748	283.6	8.8	273.2	5.2	356	82	273.2	5.2	3.66714
11R01W_109.FIN2	26.1	0.74	0.0186	0.0055	0.00187	0.0002	0.10075	18.4	5.4	12	1.3	200	690	12	1.3	34.7826
11R01W_110.FIN2	120.1	6.81	0.298	0.01	0.04252	0.00069	0.050862	264.1	8.2	268.4	4.2	208	75	268.4	4.2	1.62817
11R01W_111.FIN2	73.6	0.793	0.27	0.011	0.03873	0.0007	0.018887	241.2	8.7	244.9	4.3	189	81	244.9	4.3	1.534
11R01W_112.FIN2	156.9	1.18	0.0209	0.0028	0.00295	8.7e-05	0.0021237	20.9	2.7	18.99	0.56	50	180	18.99	0.56	9.13876
11R01W_113.FIN2	730	1.129	0.01208	0.00099	0.001942	4.4e-05	0.14145	12.18	0.99	12.51	0.29	-30	130	12.51	0.29	2.70936
11R01W_114.FIN2	520	0.9294	0.0411	0.0015	0.00629	9.7e-05	0.14775	40.8	1.5	40.42	0.62	40	73	40.42	0.62	0.931373
11R01W_115.FIN2	153	1.333	2.778	0.054	0.2213	0.0035	0.32794	1349	14	1288	18	1435	29	1435	29	10.2439
11R01W_117.FIN2	19.6	0.851	0.313	0.026	0.0457	0.0013	0.055534	270	20	288.7	7.9	100	150	288.7	7.9	6.92593
11R01W_118.FIN2	31.3	0.616	0.0122	0.0033	0.0018	0.00015	0.035771	12.1	3.3	11.61	0.99	-100	410	11.61	0.99	4.04959
11R01W_119.FIN2	895	1.562	0.01781	0.00085	0.002733	5.3e-05	0.030715	17.91	0.85	17.6	0.34	90	110	17.6	0.34	1.73088
11R01W_120.FIN2	1015	1.674	0.02054	0.00094	0.002969	5.9e-05	0.044161	20.63	0.93	19.11	0.38	184	85	19.11	0.38	7.36791

## Sheet: Mud geochemistry DSDP Leg 1, 10
	ANALYTE	SiO2	Al2O3	Fe2O3	MgO	CaO	K2O	Na2O	TiO2	MnO	P2O5	Cr2O3	V2O5	Al	Ba	Be	Ca	Cr	Cu	Fe	K	Li	Mg	Mn	Ni	P	Sc	Si	Sr	Ti	V	Zn	Ag	As	Bi	Cd	Ce	Co	Cs	Dy	Er	Eu	Ga	Gd	Ge	Hf	Ho	In	La
	METHOD2	GO_XRF76V	GO_XRF76V	GO_XRF76V	GO_XRF76V	GO_XRF76V	GO_XRF76V	GO_XRF76V	GO_XRF76V	GO_XRF76V	GO_XRF76V	GO_XRF76V	GO_XRF76V	GE_ICM90A	GE_ICM90A	GE_ICM90A	GE_ICM90A	GE_ICM90A	GE_ICM90A	GE_ICM90A	GE_ICM90A	GE_ICM90A	GE_ICM90A	GE_ICM90A	GE_ICM90A	GE_ICM90A	GE_ICM90A	GE_ICM90A	GE_ICM90A	GE_ICM90A	GE_ICM90A	GE_ICM90A	GE_ICM90A	GE_ICM90A	GE_ICM90A	GE_ICM90A	GE_ICM90A	GE_ICM90A	GE_ICM90A	GE_ICM90A	GE_ICM90A	GE_ICM90A	GE_ICM90A	GE_ICM90A	GE_ICM90A	GE_ICM90A	GE_ICM90A	GE_ICM90A	GE_ICM90A
	DETECTION	0.01	0.01	0.01	0.01	0.01	0.01	0.01	0.01	0.01	0.01	0.01	0.01	0.01	10	5	0.1	10	10	0.01	0.1	10	0.01	10	5	0.01	5	0.1	10	0.01	5	5	1	5	0.1	0.2	0.1	0.5	0.1	0.05	0.05	0.05	1	0.05	1	1	0.05	0.2	0.1
Sample1	Depth (mbsf)	%	%	%	%	%	%	%	%	%	%	%	%	%	ppm	ppm	%	ppm	ppm	%	%	ppm	%	ppm	ppm	%	ppm	%	ppm	%	ppm	ppm	ppm	ppm	ppm	ppm	ppm	ppm	ppm	ppm	ppm	ppm	ppm	ppm	ppm	ppm	ppm	ppm	ppm
3-3-2m	38.27	49.1	14.4	5.61	3.78	7.03	3.13	1.65	0.64	0.09	0.14	0.01	0.02	8.15	447	<5	4.8	82	39	4.07	2.8	58	2.29	723	52	0.06	13	22.1	195	0.4	141	125	<1	9	0.3	0.3	72.5	14.9	6.9	4.47	2.59	1.17	20	5.1	2	4	0.91	<0.2	36.2
3-11-2m	621.55	53.6	15.1	5.9	3.7	3.79	3.04	2.83	0.7	0.05	0.13	0.02	0.03	8.37	636	<5	2.6	110	49	4.18	2.7	56	2.23	430	79	0.05	13	22.2	318	0.42	113	111	<1	6	0.4	0.3	62.9	14.4	8.5	4.59	2.51	1.23	20	4.87	1	4	0.9	<0.2	29.4
89-6-2m	378.71	46.9	11.8	4.52	2.26	11.2	2.28	2.09	0.55	0.07	0.13	<0.01	0.02	6.51	255	<5	8.3	70	17	3.26	2.1	43	1.34	549	31	0.06	9	22.3	318	0.33	114	91	<1	5	0.2	0.3	48.6	8.2	7.1	3.53	2.07	0.89	15	3.86	1	4	0.73	<0.2	23.7
89-6-5m	382.5	44.9	11.7	5.04	2.35	12.3	2.25	1.69	0.54	0.08	0.13	0.01	0.03	6.4	229	<5	9.1	62	14	3.6	2	41	1.43	646	33	0.06	9	21.4	340	0.33	112	84	<1	5	0.2	0.4	51.5	8.9	7.6	3.71	2.14	0.94	15	4	1	4	0.73	<0.2	25.2
90-1-4m	5.37	49.3	14.1	5.31	3.6	6.21	3.1	1.77	0.65	0.11	0.14	0.02	0.03	7.62	427	<5	4.5	81	31	3.76	2.7	56	2.12	828	42	0.06	12	22.9	150	0.38	139	96	<1	7	0.3	<0.2	70.9	18.5	7.3	4.57	2.52	1.19	19	5.19	2	4	0.91	<0.2	35.1
90-1-6m	8.43	46.7	13.2	5.17	3.94	7.53	2.92	2.19	0.59	0.2	0.14	<0.01	0.03	7.13	382	<5	5.5	76	36	3.66	2.5	51	2.39	1421	45	0.06	11	21.8	210	0.35	132	334	<1	8	0.3	0.2	68.7	19.8	6.3	4.1	2.35	1.13	18	4.88	1	4	0.84	<0.2	34.2
90-2-3m	73.29	50.4	15.5	5.51	2.55	5.53	2.93	1.91	0.64	0.25	0.13	0.01	0.03	8.23	482	<5	4	90	51	3.83	2.5	54	1.47	1820	50	0.06	13	22.9	237	0.38	151	113	<1	<5	0.3	0.4	77.1	30.1	7.6	4.45	2.57	1.25	21	5.51	2	4	0.87	<0.2	37
90-2-4m	75.68	49.8	15.6	5.96	2.45	5.23	2.98	1.76	0.62	0.33	0.12	0.01	0.03	8.42	460	<5	3.8	87	38	4.18	2.5	58	1.44	2461	48	0.06	13	23	231	0.37	149	116	<1	<5	0.3	0.5	70.8	20.4	8.9	4.4	2.39	1.27	21	5.21	2	4	0.86	<0.2	35
90-3-2m	132.66	51.7	15.9	5.79	2.41	3.69	3.11	1.71	0.66	0.06	0.1	0.01	0.03	8.63	366	<5	2.7	91	44	4.16	2.6	62	1.43	389	80	0.05	14	24.3	214	0.4	171	123	<1	8	0.4	0.2	78.7	27	9.3	4.52	2.45	1.3	21	5.64	2	4	0.89	<0.2	38.4
90-4-1m	189.17	30	9.5	3.49	1.86	23.7	1.83	1.52	0.36	0.28	0.15	0.01	0.02	5.06	217	<5	17.1	64	33	2.45	1.6	39	1.08	2076	55	0.07	7	14.1	879	0.22	81	81	<1	<5	0.2	0.3	47.8	16.4	5.9	3.52	2.05	0.9	13	4.03	1	2	0.7	<0.2	23.1
90-4-2m	190.42	46.6	14.8	5.28	2.52	7.16	2.96	1.8	0.57	0.11	0.11	<0.01	0.03	7.96	302	<5	5.2	86	58	3.69	2.5	59	1.49	787	73	0.05	13	21.8	322	0.34	131	118	<1	<5	0.3	0.2	71.9	23.8	8.7	4.66	2.57	1.35	19	5.62	2	4	0.92	<0.2	34.4
90-4-3m	191.22	41.6	13.1	5.41	2.44	13.2	2.65	1.87	0.51	0.27	0.13	<0.01	0.02	6.89	269	<5	8.6	84	57	3.7	2.2	52	1.39	1942	84	0.05	10	17.5	495	0.28	112	109	<1	<5	0.3	0.3	62	20.7	7.4	4.36	2.44	1.15	17	4.79	1	3	0.86	<0.2	29.4
90-4-3m2	191.69	42.4	13.3	5.16	2.54	9.69	2.68	2.23	0.51	0.25	0.13	0.02	0.02	7.16	274	<5	7	93	43	3.64	2.3	55	1.49	1828	76	0.06	11	19.6	399	0.3	117	102	<1	<5	0.3	<0.2	64.8	18.2	7.9	4.42	2.58	1.19	17	5.06	2	3	0.86	<0.2	31.3
90-5-1m	236.53	53.3	16.6	6.09	2.93	2.33	3.44	2.08	0.66	0.23	0.13	0.02	0.03	9.42	339	<5	1.7	99	59	4.46	3	69	1.79	1805	89	0.05	15	23.9	150	0.41	158	155	<1	<5	0.3	0.3	75.1	20	9.9	4.95	2.85	1.28	22	5.4	2	4	1.03	<0.2	35.1
90-5-2m	238.03	51.2	15.7	5.91	2.83	2.75	3.22	2.15	0.62	0.24	0.14	0.01	0.03	7.31	275	<5	1.7	82	36	3.62	2.4	52	1.47	1497	64	0.05	12	20.4	140	0.33	126	105	<1	<5	0.4	0.2	72.8	18.9	10.2	4.79	2.67	1.26	21	5.41	2	4	0.94	<0.2	34
90-5-4m1	240.98	52.6	15.5	5.8	2.86	3.32	3.26	1.66	0.65	0.14	0.13	0.02	0.03	8.47	279	<5	2.4	87	34	4.12	2.8	57	1.69	1061	58	0.06	13	24.4	170	0.38	141	108	<1	5	0.3	0.2	68.8	17.6	10.1	5.14	3.19	1.25	22	5.44	2	5	1.09	<0.2	32
90-5-4m2	241.86	46.5	12.8	4.32	2.31	11.5	2.56	1.46	0.57	0.17	0.15	0.01	0.02	7.23	259	<5	8.8	69	26	3.21	2.3	49	1.42	1316	46	0.07	11	22.1	332	0.36	134	92	<1	<5	0.3	0.8	59.6	12.8	8	4.12	2.42	1.08	17	4.62	1	4	0.84	<0.2	28.1
90-6-2m	294.87	56.4	15.5	5.55	2.77	1.87	3.08	1.95	0.66	0.06	0.15	0.01	0.02	8.21	297	<5	1.4	85	35	3.86	2.6	57	1.61	404	47	0.06	14	25.2	129	0.38	145	112	<1	<5	0.3	0.3	67.1	11.7	10	4.63	2.64	1.23	21	5.2	2	4	0.93	<0.2	31.3
90-7-2m	342.85	51.7	14.2	5.14	2.68	6.4	2.88	1.69	0.62	0.1	0.14	0.01	0.02	7.63	270	<5	4.6	74	25	3.56	2.4	54	1.56	764	45	0.07	12	23.6	213	0.37	130	104	<1	<5	0.3	0.3	61.1	11.5	9.5	4.34	2.43	1.1	19	4.68	1	4	0.87	<0.2	28.7
90-7-3m	344.9	53.8	15.1	5.88	2.84	2.98	3.05	1.79	0.65	0.17	0.16	0.01	0.03	8	282	<5	2.1	84	32	4.09	2.5	58	1.63	1226	46	0.06	13	24.2	144	0.38	143	106	<1	<5	0.3	0.7	60.9	12	10.3	4.08	2.34	1.15	20	4.8	2	4	0.85	<0.2	29.2
90-9-1m	471.46	51.1	13.5	4.68	2.67	8.85	2.77	1.7	0.62	0.06	0.14	0.01	0.03	7.53	271	<5	6	71	39	3.35	2.5	51	1.63	504	41	0.06	12	22.2	235	0.38	137	104	<1	<5	0.2	0.3	48.5	7.6	8.5	3.62	2.05	0.92	17	3.83	1	4	0.75	<0.2	23.7
90-9-1m2	471.98	48.6	12.7	4.53	2.51	10.2	2.59	1.65	0.59	0.07	0.15	<0.01	0.03	6.71	246	<5	7.2	68	21	3.14	2.2	44	1.45	482	30	0.07	11	22	263	0.35	129	91	<1	<5	0.2	0.4	49.5	8.3	8.6	3.79	2.22	0.94	16	3.96	1	4	0.76	<0.2	23.8
90-11-2m	677.63	51.2	14.2	5.07	3.17	5.69	2.72	2.39	0.61	0.1	0.14	<0.01	0.02	7.59	332	<5	4.1	75	39	3.52	2.3	53	1.84	727	48	0.06	12	23.5	267	0.36	127	93	<1	<5	0.3	0.3	52.4	11.8	7.9	3.79	2.21	1.12	18	4.67	1	4	0.78	<0.2	25
90-11-6m	683.7	53.7	14.4	5.21	2.89	4.46	2.95	1.74	0.63	0.19	0.15	0.01	0.03	7.67	249	<5	3.2	76	39	3.63	2.5	52	1.66	1458	54	0.07	12	24	194	0.37	127	108	<1	<5	0.3	0.3	59.8	15.7	9.6	4.24	2.55	1.15	19	4.75	2	4	0.87	<0.2	28.4
91-1-2m	61.64	46.5	13	5.13	4.74	8.93	3.06	1.64	0.61	0.09	0.15	<0.01	0.02	7.32	413	<5	6.2	74	45	3.79	2.8	54	2.93	672	48	0.06	11	20.3	193	0.38	120	170	<1	8	0.2	<0.2	68.1	13.9	5.4	4.25	2.52	1.15	17	4.54	1	4	0.86	<0.2	33.5
91-2-2m	125.32	50.6	14.4	5.79	3.98	6.1	3.03	2.01	0.64	0.09	0.15	0.02	0.02	8.68	511	<5	4.4	89	48	4.46	2.9	55	2.54	753	58	0.07	13	23.6	202	0.42	137	126	<1	8	0.3	0.2	79.5	16.5	6.2	4.55	2.71	1.27	21	5.21	2	4	0.94	<0.2	39.4
91-4-3m	180.48	50.5	13.9	5.36	3.76	6.58	2.97	1.79	0.65	0.08	0.14	0.02	0.02	8.02	427	<5	4.6	81	38	3.92	2.7	59	2.29	681	47	0.06	12	22.6	153	0.39	126	98	<1	10	0.2	0.2	70.1	14.7	6.5	4.53	2.65	1.17	19	5.02	2	4	0.91	<0.2	34.8
91-6-3m	304.8	51.7	15.2	5.69	2.9	5.65	2.84	1.48	0.67	0.11	0.15	0.02	0.03	8.56	458	<5	3.9	90	41	4.17	2.5	59	1.78	797	54	0.06	13	22.6	155	0.41	160	112	<1	10	0.3	0.4	73.9	14.7	6.7	4.94	2.71	1.26	20	5.23	2	4	0.98	<0.2	37.2
91-7-3m	411.23	43.8	13	5.31	3.78	11.3	2.82	2.14	0.55	0.1	0.13	<0.01	0.02	7.28	442	<5	7.9	84	33	3.86	2.5	56	2.31	780	51	0.05	10	19.6	201	0.33	111	92	<1	<5	0.2	0.2	71.6	14.9	5.1	3.54	2.01	1.08	18	4.15	1	3	0.69	<0.2	35.4
91-8-1m	490.16	32.5	10.3	3.73	2.39	19.7	1.81	2.78	0.42	0.32	0.11	0.02	0.02	5.61	232	<5	13.7	98	39	2.74	1.7	51	1.44	2413	71	0.04	8	14.7	1222	0.26	94	79	<1	<5	0.2	1.2	54.4	15.9	5.3	3.86	2.08	0.95	14	4.01	1	3	0.75	<0.2	25.6
91-9-5m	537.17	37.4	9.12	3.38	1.67	21.8	1.75	1.54	0.4	0.17	0.09	<0.01	0.01	5.06	245	<5	15.2	71	32	2.42	1.6	41	1.02	1288	46	0.04	7	16.5	817	0.24	69	74	<1	<5	0.1	<0.2	42.8	7.9	3.8	3.37	1.99	0.91	12	3.68	<1	3	0.7	<0.2	20.9
91-10-2m	653.66	50.4	9.8	4.02	1.7	13.6	1.91	2.23	0.49	0.13	0.14	0.01	<0.01	5.49	283	<5	9.4	83	29	2.95	1.8	38	1.09	1199	61	0.06	7	21.9	341	0.31	82	77	<1	7	0.1	0.4	49.3	14.7	4.5	3.98	2.47	0.96	12	4.09	1	6	0.82	<0.2	23.7
91-11-2m	772.96	51.6	14.1	5.15	2.96	6.29	3.02	2.29	0.62	0.26	0.15	0.01	0.03	7.99	289	<5	4.4	90	70	3.82	2.7	54	1.85	2104	69	0.06	13	22.5	189	0.38	175	155	<1	<5	0.3	1.3	57.9	19.2	9.3	4.26	2.62	1	19	4.4	1	4	0.9	<0.2	26.9
91-12-3m	782.69	54.9	16.5	5.91	2.64	2.7	3.51	1.53	0.68	0.12	0.09	0.02	0.03	9.42	383	<5	2	89	45	4.42	3.2	71	1.66	1053	53	0.05	15	24.9	174	0.42	160	129	<1	<5	0.3	0.3	76.9	13.9	10.3	4.88	2.79	1.21	22	5.14	2	4	0.98	<0.2	37.9
91-12-3m2	783.23	53.2	15.4	5.73	2.5	2.75	3.25	1.45	0.63	0.06	0.1	0.01	0.03	8.29	312	<5	2	76	26	3.98	2.7	62	1.46	519	44	0.04	13	24.4	176	0.38	150	120	<1	<5	0.5	0.4	80.9	15.4	10.5	4.96	2.74	1.23	22	5.71	2	5	0.98	<0.2	38.8
91-13-3m	792.31	57.6	15.8	6.03	3.15	1.34	3.4	1.76	0.66	0.38	0.17	0.02	0.04	9.03	297	<5	1	102	101	4.44	3	59	1.96	3112	103	0.07	14	25.6	112	0.41	160	141	<1	<5	0.4	<0.2	70.7	28	9.9	5.24	3.02	1.27	21	5.46	2	5	1.06	<0.2	31.6
91-14-2m	800.3	58.7	14.8	5.8	3.31	1.14	3.22	2	0.65	0.85	0.18	0.01	0.02	8.44	289	<5	0.8	94	36	4.3	2.9	57	2.09	6754	79	0.08	13	24.8	107	0.4	132	118	<1	<5	0.3	<0.2	69.9	15.2	9.4	5.23	3.28	1.25	20	5.56	2	6	1.11	<0.2	32.7
91-15-3m	810.94	56.8	16.5	6.03	3.2	1.26	3.41	1.72	0.66	0.11	0.14	0.02	0.03	9.4	256	<5	0.9	88	97	4.43	3.1	65	1.96	903	71	0.06	15	25.5	106	0.41	159	138	<1	<5	0.4	0.3	81.8	22.1	10.8	5.42	3.16	1.38	22	5.72	2	5	1.12	<0.2	35.4
91-18-6m	843.03	53.9	14	5.26	3.17	5.67	3.02	2.31	0.62	0.09	0.16	0.02	0.03	8.08	377	<5	4	79	34	3.92	2.8	55	1.99	797	50	0.07	12	23.4	273	0.38	115	107	<1	<5	0.3	<0.2	63.8	10.2	10.1	5.25	3.13	1.27	19	5.53	1	4	1.07	<0.2	29.9
91-22-1m	867.39	49.2	13.8	6.19	3.13	7.71	3.3	1.9	0.64	0.2	0.14	0.01	0.03	7.82	301	<5	5.3	82	48	4.58	2.9	53	1.94	1725	62	0.07	13	22.8	295	0.39	132	117	<1	<5	0.3	0.2	58.4	15.1	10.5	4.49	2.6	1.11	19	4.75	1	4	0.9	<0.2	27.5
DUP-90-4-1m		29.9	9.44	3.47	1.84	23.5	1.84	1.51	0.36	0.29	0.15	0.01	0.01	5.1	219	<5	17.1	63	33	2.44	1.6	40	1.06	2090	61	0.07	7	14	885	0.22	81	83	<1	<5	0.2	0.3	43.1	14.6	5.2	3.07	1.77	0.82	12	3.7	1	2	0.63	<0.2	21.2
REP-91-22-1														7.69	299	<5	5.3	81	56	4.48	2.9	54	1.93	1664	63	0.06	13	21.4	282	0.39	131	117	<1	<5	0.3	<0.2	59.2	14.9	10.3	4.51	2.7	1.14	19	4.64	1	4	0.92	<0.2	27.6
1samples are were collected from the IODP Gulf Coast Repository in College Station, TX USA. Names defined by Site#-Core#-Sec#; m = mud
2Mud samples were dried and pulverized in Cr steel to 85% passing 75 μm, and geochemically analyzed using multi-element analysis by sodium fusion inductively coupled plasma atomic emission spectroscopy (ICP-AES), inductively-coupled plasma mass spectrometry (ICP-MS), and multi-element ore grade analysis by borate fusion x-ray diffraction (XRF) at SGS Mineral Analytical Services.
Calculations in text:
CIA = [Al2O3 / (Al2O3 + K2O + CaO* + Na2O)] * 100 where compositions are in molar proportions and where CaO* is non-carbonate
N = normalized to chondrite (Boynton, W., 1984. Geochemistry of the rare earth elements: Meteorite studies, in P. Henderson, ed., Rare Earth Element Geochemistry, Elsevier, p. 63-114)
[truncated: 23 more columns]
